# Supplementary material
Source: bioRxiv or medRxiv preprint supplement (https://www.biorxiv.org/highwire/filestream/273/field_highwire_adjunct_files/1/000992-2.pdf)
Supplement: Supplementary file [file 000992-2.pdf]

**Table S2. Selected pathways enriched among genes with differential exon usage associated with *SF3B1* mutations (FDR = 0.1).**

| pathway                               | # genes | p-value              | gene names                        |
|---------------------------------------|---------|----------------------|-----------------------------------|
| Antigen processing-Cross presentation | 4       | $3.6 \cdot 10^{-3}$  | <i>HLA-F, B2M, CYBA</i>           |
| Interferon Signaling                  | 4       | $2.8 \cdot 10^{-3}$  | <i>HLA-F, GBP2, B2M, EIF4A2</i>   |
| Translation                           | 4       | $2.6 \cdot 10^{-3}$  | <i>RPL24, RPL31, EIF4A2, EIF5</i> |
| mRNA Splicing                         | 3       | $1.09 \cdot 10^{-2}$ | <i>SRSF7, FUS, HN-RNPH2</i>       |

The first column indicates the *REACTOME* pathway name. The second column depicts the number of genes in that specific pathway with DEU associated to mutations in *SF3B1*. The third column shows the *p*-value resulting from testing for over-representation of hits on that pathway compared to a background set of genes with high expression (Fisher's exact test). The fourth column list the genes with DEU associated with the mutation in *SF3B1* among those in the pathway.
